# Supplementary material for: Third-order nonlinear optical property contrast as self-assembly recognition for nanorings⊃C60
Source: Royal Society of Chemistry journal article supplement (doi:10.1039/d1nj06079a), 2022-01-01
Supplement: d1nj06079a1.pdf [file d1nj06079a1.pdf]

## Supporting Information

### Third-Order Nonlinear Optical Property Contrast as Self- Assembly Recognition for Nanorings $\supset C_{60}$

Nana Ma,<sup>\*a</sup> Wenyue Guo,<sup>a</sup> Zhu Zhu<sup>b</sup> and Guisheng Zhang<sup>\*a</sup>

<sup>a</sup>School of Chemistry and Chemical Engineering, Key Laboratory of Green Chemical Media and Reactions, Ministry of Education; NMPA Key Laboratory for Research and Evaluation of Innovative Drug, Henan Normal University, Xinxiang, Henan, 453007, China.

<sup>b</sup>Xiangyang Public Inspection and Testing Center, Xiangyang, Hubei, 441000, China.

#### Content

**Fig. S1.** The optimized structures of nanorings in top view and side view.

**Fig. S2.** The HOMO and LUMO composition and HOMO-LUMO gap ( $E_{H-L}$ ) of nanorings  $\supset C_{60}$ .

**Fig. S3.** The electron density difference maps (EDDMs) of the ground state and the excited state of the nanorings corresponding to the primary absorption.

**Fig. S4.** The curve of  $\gamma$  values with the number of states by SOS method.

**Table S1.** The TDDFT results calculated at  $\omega$ B97XD/6-31+G(d) level (absorption wavelength ( $\lambda$ /nm), transition energy ( $\Delta E$ /eV), and oscillator strength ( $f$ ) of major molecular orbital transitions) for nanorings.

**Table S2.** The first hyperpolarizabilities ( $\beta$ ) of nanorings and nanorings  $\supset C_{60}$ .

**Table S3.** The frequency-dependent second hyperpolarizabilities  $\gamma(-\omega; \omega, 0, 0)$  of nanorings and nanorings  $\supset C_{60}$ .

**Table S4.** The third-order NLO coefficients of nanorings and nanorings  $\supset C_{60}$  in dichloroethane.

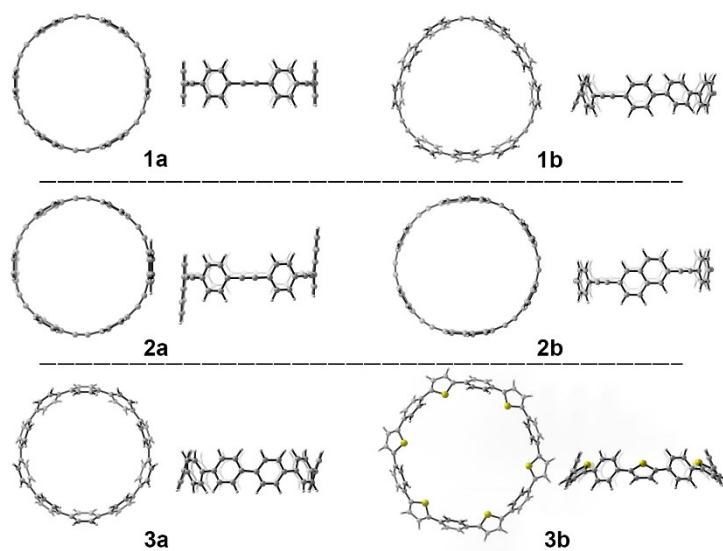

Fig. S1. The optimized structures of nanorings in top view and side view.

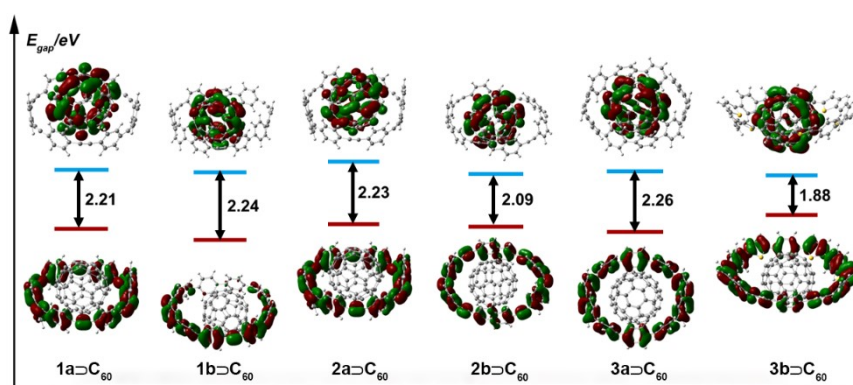

Fig. S2. The HOMO and LUMO composition and HOMO-LUMO gap ( $E_{H-L}$ ) of nanorings@C<sub>60</sub>.

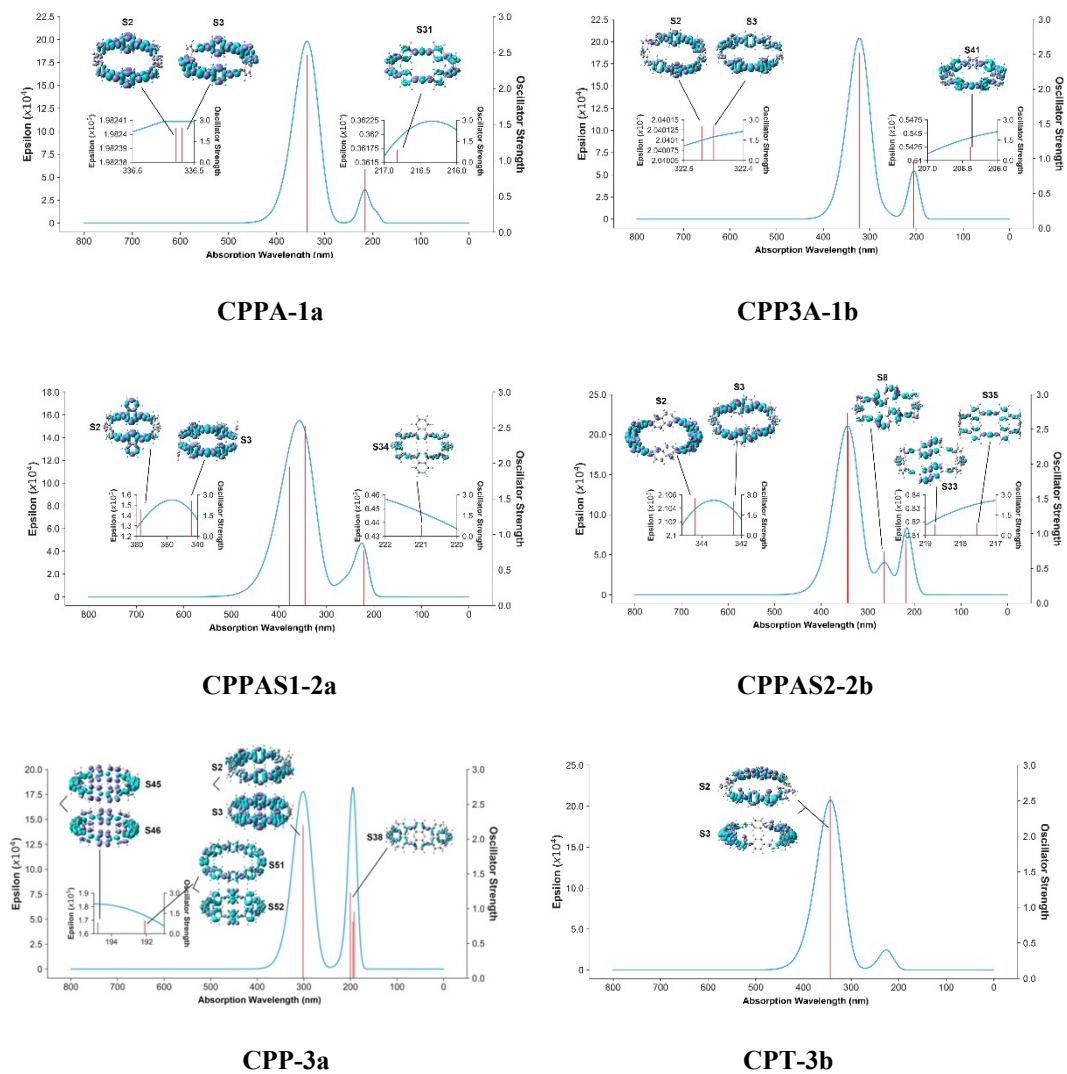

**Fig. S3.** The electron density difference maps (EDDMs) of the ground state and the excited state of the nanorings corresponding to the primary absorption.

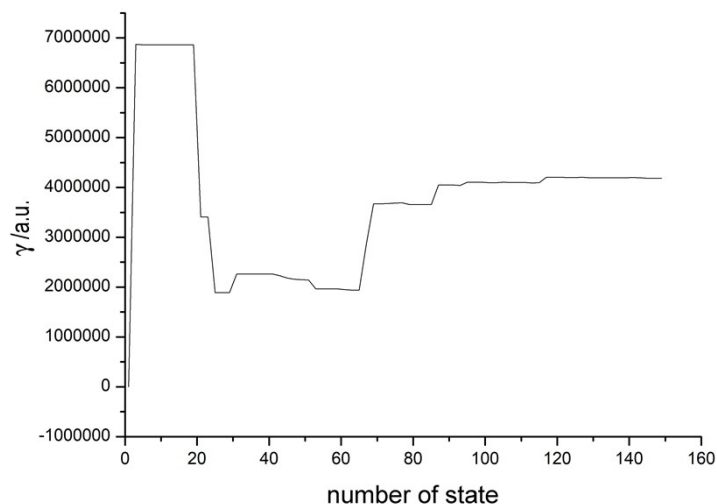

**Fig. S4.** The curve of  $\gamma$  values with the number of states by SOS method.

**Table S1.** The TDDFT results calculated at  $\omega$ B97XD/6-31+G(d) level (absorption wavelength ( $\lambda$ /nm), transition energy ( $\Delta E$ /eV), and oscillator strength ( $f$ ) of major molecular orbital transitions) for nanorings.

| nanoring  | Transition State | $\Delta E$ /eV | $\lambda$ /nm | $f$    |
|-----------|------------------|----------------|---------------|--------|
| <b>1a</b> | S0-S2            | 3.6842         | 336.53        | 2.4387 |
|           | S0-S3            | 3.6843         | 336.52        | 2.4560 |
|           | S0-S31           | 5.7183         | 216.82        | 0.8775 |
| <b>1b</b> | S0-S2            | 3.8449         | 322.47        | 2.5150 |
|           | S0-S3            | 3.8451         | 322.45        | 2.5131 |
|           | S0-S41           | 6.0073         | 206.39        | 0.9747 |
| <b>2a</b> | S0-S2            | 3.2835         | 377.59        | 1.9473 |
|           | S0-S3            | 3.6043         | 343.99        | 2.5293 |
|           | S0-S34           | 5.6103         | 220.99        | 0.7706 |
| <b>2b</b> | S0-S2            | 3.6007         | 344.34        | 2.7280 |
|           | S0-S3            | 3.6209         | 342.41        | 2.4717 |
|           | S0-S8            | 4.6695         | 265.52        | 0.7442 |
|           | S0-S33           | 5.6685         | 218.73        | 0.7710 |
|           | S0-S35           | 5.6998         | 217.53        | 0.9009 |
| <b>3a</b> | S0-S2            | 4.1088         | 301.75        | 2.1955 |
|           | S0-S3            | 4.1088         | 301.75        | 2.1956 |
|           | S0-S38           | 6.1909         | 200.27        | 1.2291 |
|           | S0-S45           | 6.3658         | 194.77        | 0.8072 |
|           | S0-S46           | 6.3658         | 194.77        | 0.8068 |
|           | S0-S51           | 6.4543         | 192.10        | 0.9486 |
|           | S0-S52           | 6.4543         | 192.09        | 0.9487 |
| <b>3b</b> | S0-S2            | 3.6128         | 343.18        | 2.5611 |
|           | S0-S3            | 3.6128         | 343.18        | 2.5610 |

**Table S2.** The first hyperpolarizabilities of nanorings and nanorings  $\supset C_{60}$ .

|                                       | a.u.      |           |           |           | esu ( $\times 10^{-30}$ ) |
|---------------------------------------|-----------|-----------|-----------|-----------|---------------------------|
|                                       | $\beta_x$ | $\beta_y$ | $\beta_z$ | $\beta^a$ | $\beta$                   |
| <b>1a</b>                             | 0         | 0         | 0         | 0         | 0                         |
| <b>1b</b>                             | 156       | -399      | 750       | 864       | 7                         |
| <b>2a</b>                             | 10        | -14       | -10       | 20        | 0.2                       |
| <b>2b</b>                             | 0         | 0         | 0         | 0         | 0                         |
| <b>3a</b>                             | 0         | 0         | 0         | 0         | 0                         |
| <b>3b</b>                             | 0         | 0         | -9034     | 9034      | 78                        |
| <b>C<sub>60</sub></b>                 | 0         | 0         | 0         | 0         | 1                         |
| <b>1a <math>\supset C_{60}</math></b> | -4353     | -1973     | 4481      | 6551      | 57                        |
| <b>1b <math>\supset C_{60}</math></b> | 1936      | -342      | -1269     | 2340      | 20                        |
| <b>2a <math>\supset C_{60}</math></b> | 1018      | 2304      | -636      | 2598      | 22                        |
| <b>2b <math>\supset C_{60}</math></b> | 9097      | 4145      | -1414     | 10096     | 87                        |
| <b>3a <math>\supset C_{60}</math></b> | 16        | 14        | 14        | 25        | 0.2                       |
| <b>3b <math>\supset C_{60}</math></b> | -68       | -11       | 3476      | 3476      | 30                        |

<sup>a</sup>the  $\beta$  were calculated by software Multiwfn in the sum-overstates (SOS) method, the total magnitude of  $\beta$  can be measured by eqs.

$$\beta_{ABC}(-\omega_\sigma; \omega_1, \omega_2) = \hat{P}[A(-\omega_\sigma); B(\omega_1), C(\omega_2)] \sum_{i \neq 0} \sum_{j \neq 0} \frac{\mu_{0i}^A \overline{\mu_{ij}^B} \mu_{j0}^C}{(\Delta_i - \omega_\sigma)(\Delta_i - \omega_2)};$$

$$\mu_{ij}^A = \langle i | \hat{\mu}^A | j \rangle; \quad \overline{\mu_{ij}^A} = \mu_{ij}^A - \mu_{00}^A \delta_{ij}; \quad \omega_\sigma = \sum_i \omega_i$$

**Table S3.** The frequency-dependent second hyperpolarizabilities  $\gamma(-\omega; \omega, 0, 0)$  of nanorings and nanorings  $\supset C_{60}$ .

|                                       | esu ( $\times 10^{-36}$ )                           |                                                     |                                                     |
|---------------------------------------|-----------------------------------------------------|-----------------------------------------------------|-----------------------------------------------------|
|                                       | $\gamma(\omega=0.06 \text{ a.u., } 760 \text{ nm})$ | $\gamma(\omega=0.07 \text{ a.u., } 650 \text{ nm})$ | $\gamma(\omega=0.08 \text{ a.u., } 570 \text{ nm})$ |
| <b>1a</b>                             | 1151                                                | 1214                                                | 1280                                                |
| <b>1b</b>                             | 320                                                 | 379                                                 | 521                                                 |
| <b>2a</b>                             | 1400                                                | 1457                                                | 1480                                                |
| <b>2b</b>                             | 649                                                 | 662                                                 | 778                                                 |
| <b>3a</b>                             | 656                                                 | 780                                                 | 967                                                 |
| <b>3b</b>                             | 350                                                 | 550                                                 | 919                                                 |
| <b>1a <math>\supset C_{60}</math></b> | 4297                                                | 4928                                                | 5853                                                |
| <b>1b <math>\supset C_{60}</math></b> | 1506                                                | 1683                                                | 1906                                                |
| <b>2a <math>\supset C_{60}</math></b> | 4170                                                | 5093                                                | 6677                                                |
| <b>2b <math>\supset C_{60}</math></b> | 3417                                                | 3866                                                | 4473                                                |
| <b>3a <math>\supset C_{60}</math></b> | 3504                                                | 3896                                                | 4408                                                |
| <b>3b <math>\supset C_{60}</math></b> | 5531                                                | 6406                                                | 7720                                                |

**Table S4.** The third-order NLO coefficients of nanorings and nanorings  $\supset C_{60}$  in dichloroethane.

|                                       | a.u.       |            |            | esu ( $\times 10^{-36}$ ) |          | $R^a$ |
|---------------------------------------|------------|------------|------------|---------------------------|----------|-------|
|                                       | $\gamma_x$ | $\gamma_y$ | $\gamma_z$ | $\gamma$                  | $\gamma$ |       |
| <b>1a</b>                             | -2.64      | -2.57      | -0.66      | 3.74                      | 1886     | 1.92  |
| <b>1b</b>                             | -0.83      | -0.83      | -0.49      | 1.27                      | 638      | 2.20  |
| <b>2a</b>                             | -2.66      | -2.06      | -1.07      | 3.53                      | 1780     | 1.48  |
| <b>2b</b>                             | -0.97      | -2.66      | -1.19      | 3.07                      | 1547     | 2.34  |
| <b>3a</b>                             | -1.48      | -1.48      | -0.81      | 2.25                      | 1131     | 2.63  |
| <b>3b</b>                             | -0.06      | -0.10      | -0.49      | 0.50                      | 251      | 1.48  |
| <b>C<sub>60</sub></b>                 | -2.57      | -2.45      | -2.53      | 4.36                      | 2198     | 1.54  |
| <b>1a <math>\supset C_{60}</math></b> | -5.13      | -4.93      | -1.36      | 7.24                      | 3647     | 1.18  |
| <b>1b <math>\supset C_{60}</math></b> | -2.16      | -1.41      | -0.67      | 2.66                      | 1342     | 1.19  |
| <b>2a <math>\supset C_{60}</math></b> | -2.53      | -5.06      | -0.75      | 5.70                      | 2871     | 1.07  |
| <b>2b <math>\supset C_{60}</math></b> | -2.67      | -3.85      | -0.94      | 4.78                      | 2408     | 0.96  |
| <b>3a <math>\supset C_{60}</math></b> | -4.78      | -4.85      | -1.42      | 6.95                      | 3501     | 1.31  |
| <b>3b <math>\supset C_{60}</math></b> | -5.23      | -5.19      | -1.96      | 7.62                      | 3840     | 0.98  |

<sup>a</sup>the magnification of  $\gamma$  value in solution divided by  $\gamma$  value in gas phase.
